# Supplementary material
Source: HighWire-hosted journal article supplement (https://bmjopen.bmj.com/content/11/9/e051230)
Supplement: inline-supplementary-material-1 [file inline-supplementary-material-1.pdf]

**Appendix 1**

Search Strategy Example: MEDLINE (via Ovid) search

**Terms specific to vitamin D**

#1 exp Vitamin D/

#2 (Vitamin D OR Vitamin D2 OR Vitamin D3 OR Cholecalciferol\* OR Calciol OR Hydroxycholecalciferol\* OR Hydroxyvitamin\* D OR Calcitriol OR Calcidiol OR Calderol OR Calcifediol OR Hydroxycholecalciferol OR Dedrogyl OR Hidroferol OR Ergocalciferol\* OR Calciferol\* OR Ercalcidiol OR Hydroxycalciferol OR Dihydrotachysterol OR Tachystin OR Dihydrotachysterin OR Calcamine OR Alphacalcidol OR alfacalcidol). ab,ti.

#3 #1 OR #2

**Terms specific to overweight and obesity**

#4 exp overweight/

#5 exp obesity/

#6 exp adiposity/

#7 (overweight\* OR over weight\* OR obes\* OR adipos\* OR fat). ab,ti.

#8 #4 OR #5 OR #6 OR #7

**Terms for identifying randomized controlled trials**

#9 exp randomized controlled trial/

#10 randomized controlled trial.pt.

#11 controlled clinical trial.pt.

#12 (random\* OR placebo OR sham OR trial OR groups). ab,ti.

#13 #9 OR #10 OR #11 OR #12

**Combination of terms to identify randomized controlled trials of vitamin D for obese and overweight subjects**

#3 AND #8 AND #13
